# Supplementary material for: Host-specific signatures of the cell wall changes induced by the plant parasitic nematode, Meloidogyne incognita
Source: PubMed Central journal article supplement (PMC6251906; doi:10.1038/s41598-018-35529-7), 2018-11-23
Supplement: 41598_2018_35529_MOESM1_ESM.pdf [file 41598_2018_35529_MOESM1_ESM.pdf]

**Host-specific signatures of the cell wall changes induced by the plant parasitic nematode, *Meloidogyne incognita***

Refik Bozbuga, Catherine J. Lilley, J. Paul Knox, Peter E. Urwin\*

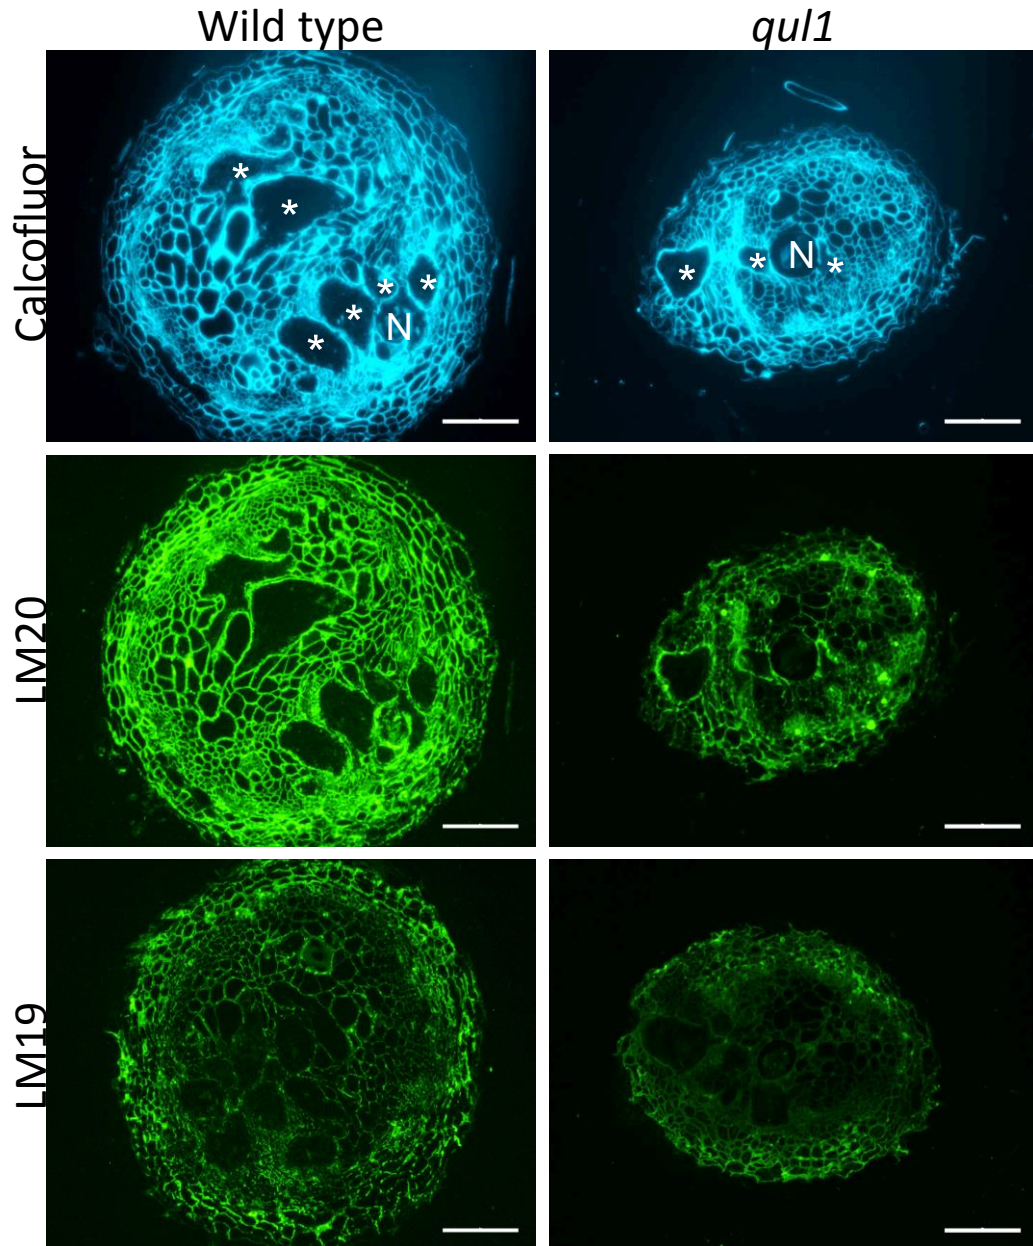

**Supplementary Figure 1.** Calcofluor-white-stained transverse sections and immunolabelling of methyl esterified and de-esterified pectin homogalacturonan in nematode infected *Arabidopsis* mutant *qul1* in comparison to infected wild type plants at 21 dpi. The LM20 antibody localizes the methyl esterified pectic homogalacturonan and the LM19 antibody localizes the de-esterified pectic homogalacturonan. Asterisks indicate giant cells in nematode feeding site; N, nematode; Bars: 100  $\mu$ m.

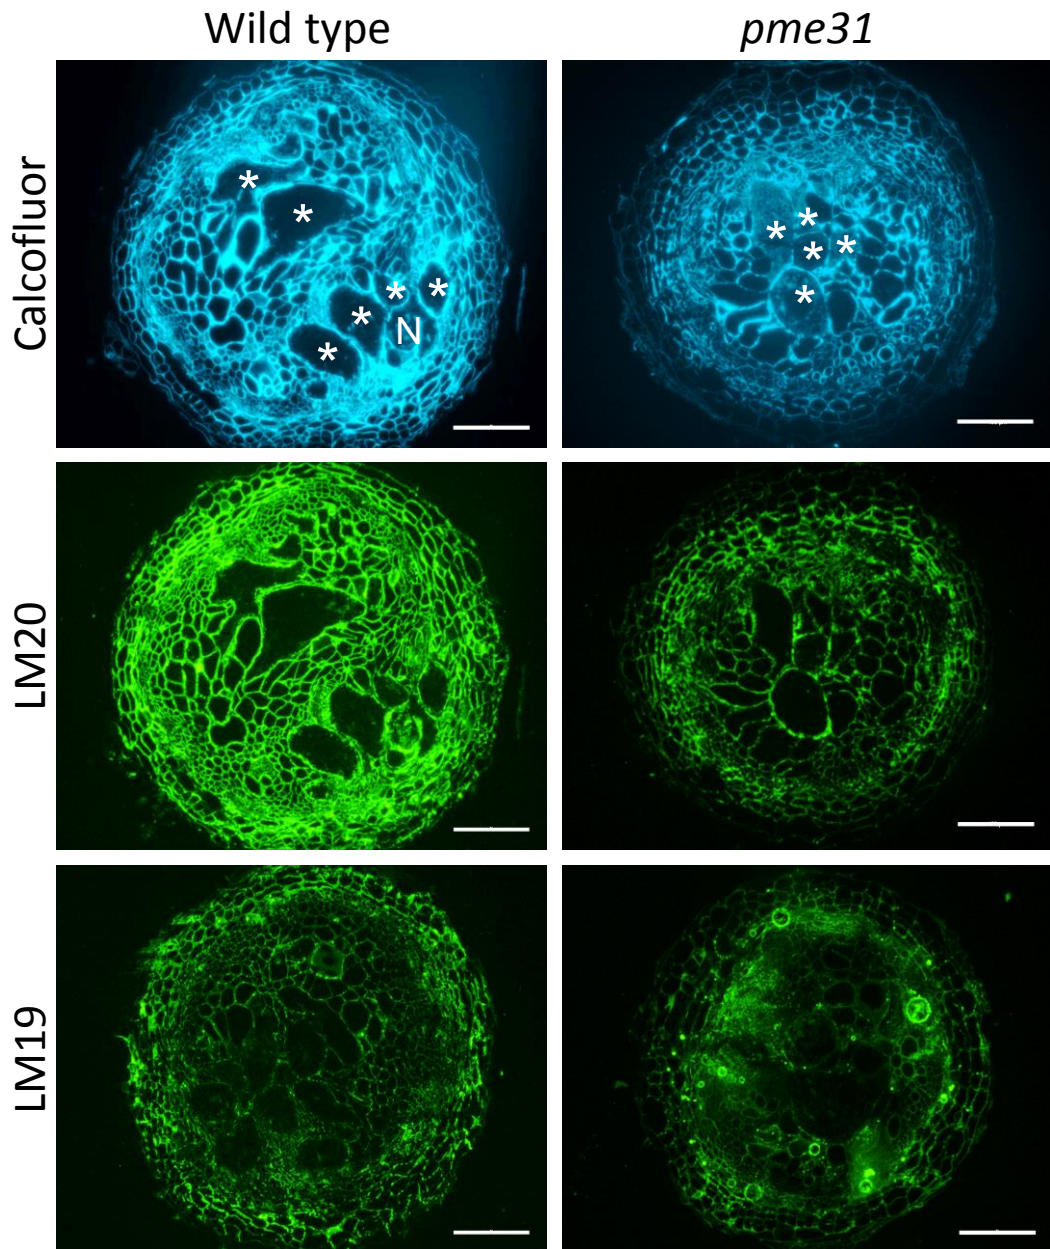

**Supplementary Figure 2.** Calcofluor-white-stained transverse sections and immunolabelling of methyl esterified and de-esterified pectin homogalacturonan in nematode infected *Arabidopsis* mutant *pme31* in comparison to infected wild type plants at 21 dpi. The LM20 antibody localizes the methyl esterified pectic homogalacturonan and the LM19 antibody localizes the de-esterified pectic homogalacturonan. Asterisks indicate giant cells in nematode feeding site; N, nematode; Bars: 100  $\mu$ m.

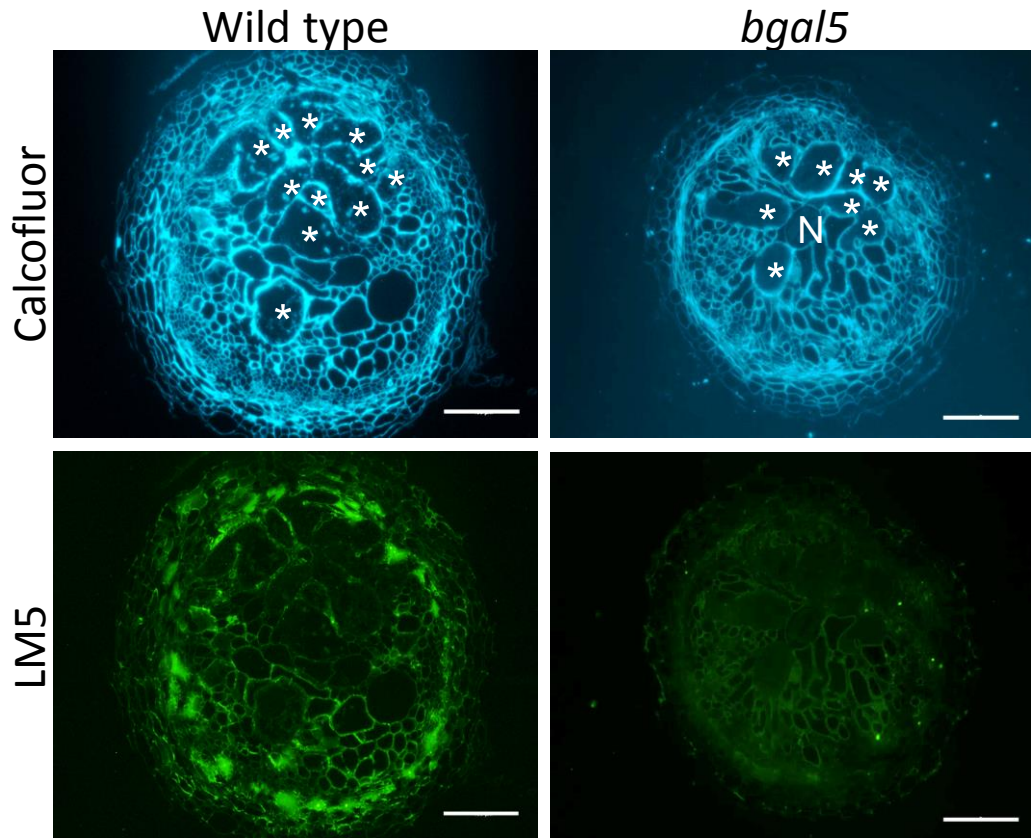

**Supplementary Figure 3.** Calcofluor-white-stained transverse sections and immunolabelling of galactan in nematode infected *Arabidopsis* mutant *bga15* in comparison to infected wild type plants at 21 dpi. The LM5 antibody localises the galactan epitope, which is reduced in the mutant. Asterisks indicate giant cells in nematode feeding site; N, nematode; Bars: 100  $\mu$ m.

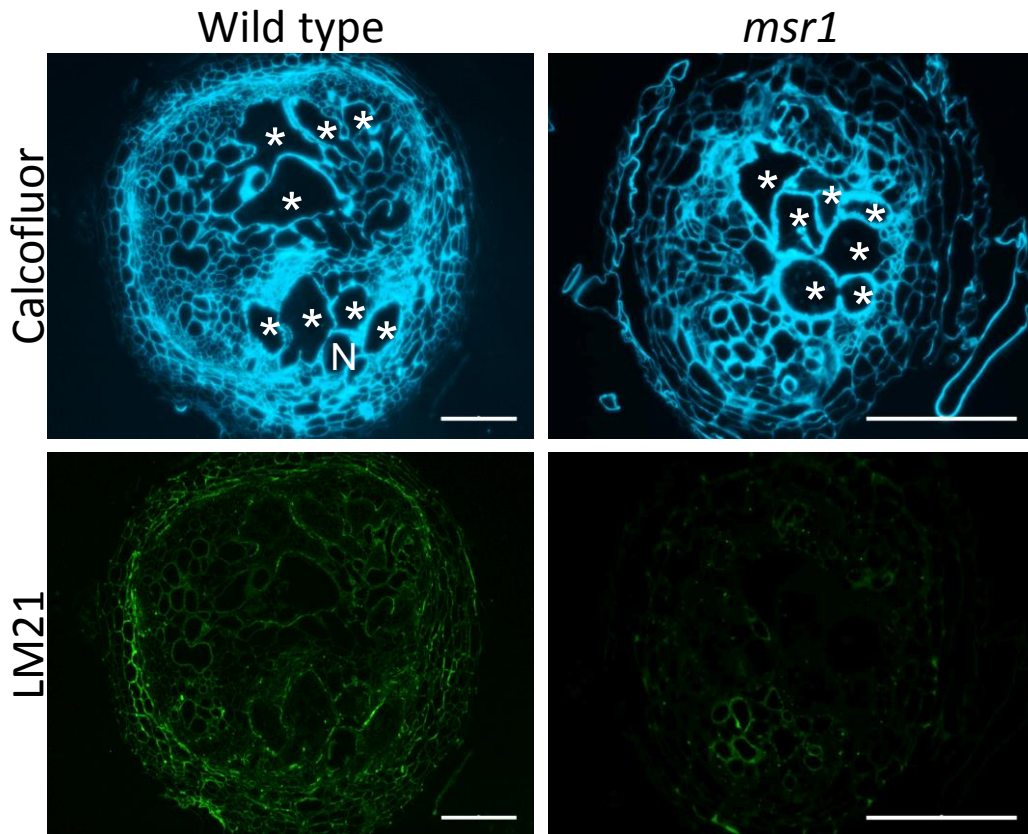

**Supplementary Figure 4.** Calcofluor-white-stained transverse sections and immunolabelling of mannan in nematode infected *Arabidopsis* mutant *msr1* in comparison to infected wild type plants at 21 dpi. The LM21 antibody localises the mannan epitope, which is reduced in the mutant. Asterisks indicate giant cells in nematode feeding site; N, nematode; Bars: 100  $\mu$ m.

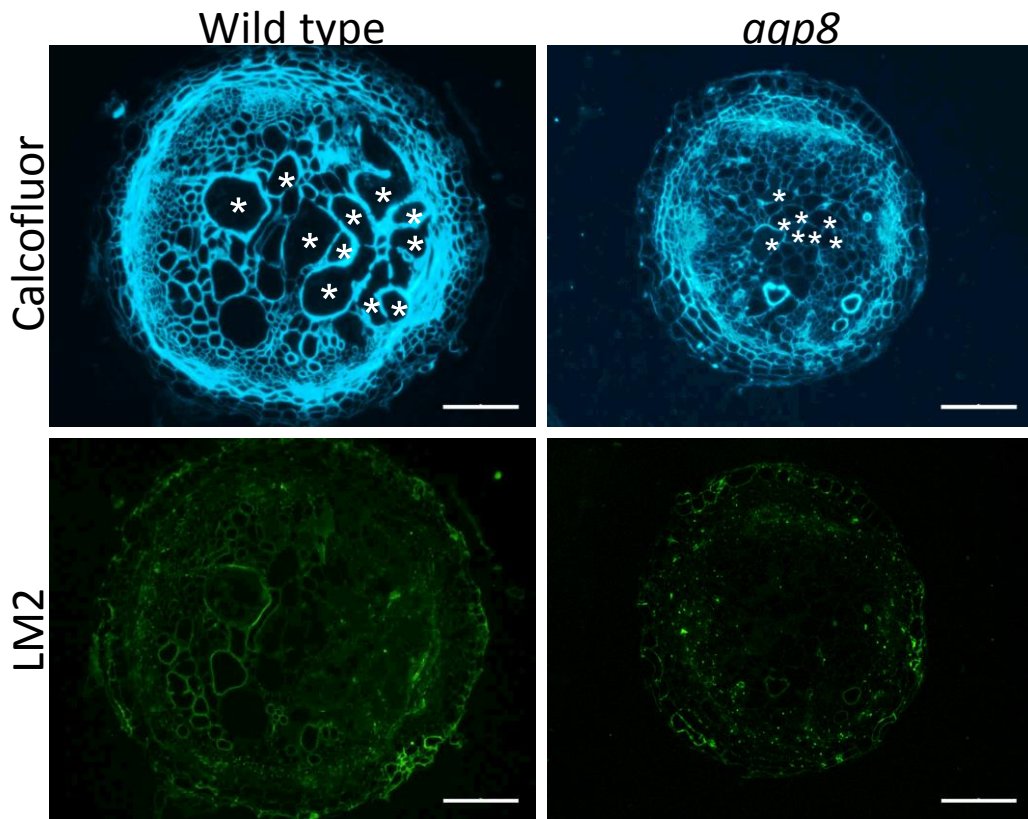

**Supplementary Figure 5.** Calcofluor-white-stained transverse sections and immunolabelling of arabinogalactan proteins in nematode infected *Arabidopsis* mutant *agp8* in comparison to infected wild type plants at 21 dpi. The LM2 antibody localises the arabinogalactan-protein epitope. Asterisks indicate giant cells in nematode feeding site; N, nematode; Bars: 100  $\mu$ m.

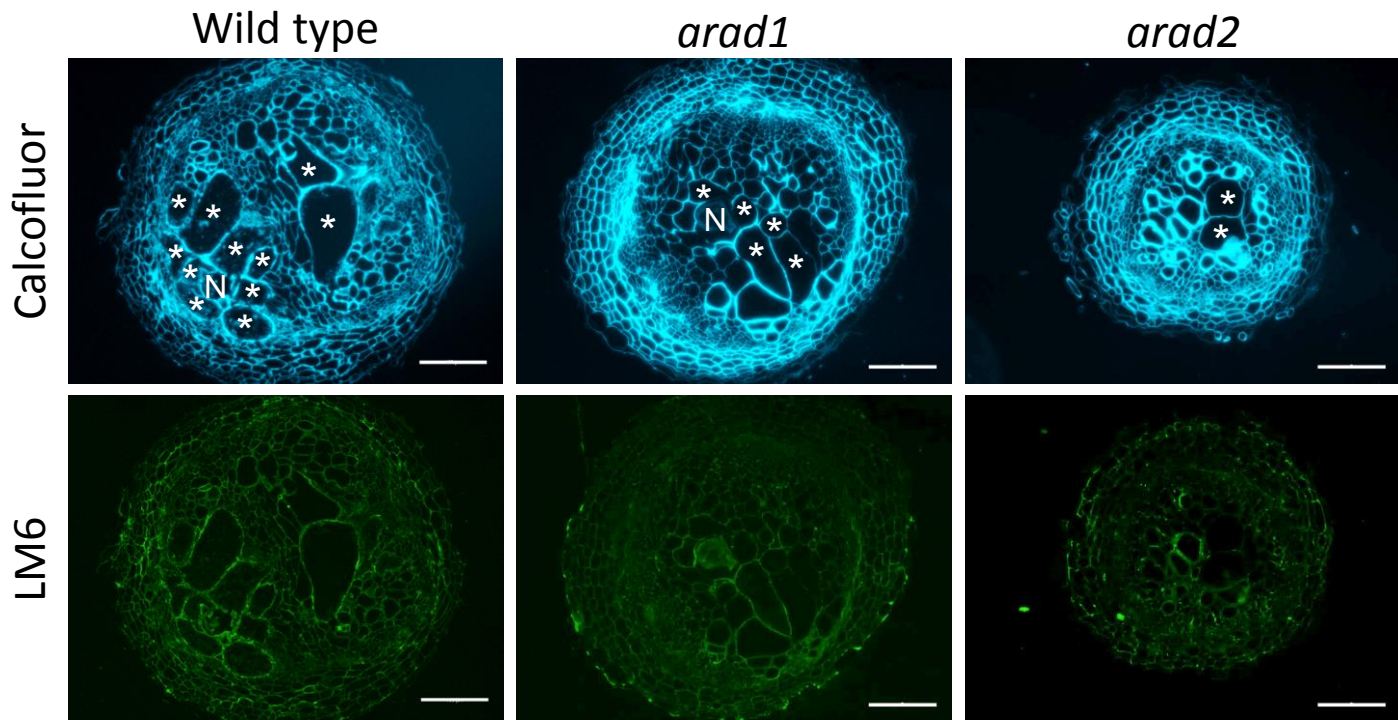

**Supplementary Figure 6.** Calcofluor-white-stained transverse sections and immunolabelling of arabinan in nematode infected *Arabidopsis* mutants *arad1* and *arad2* in comparison to infected wild type plants at 21 dpi. The LM6 antibody localises the arabinan epitope. Asterisks indicate giant cells in nematode feeding site; N, nematode; Bars: 100  $\mu$ m.

Supplementary Table 1: Primers for testing homozygosity of *Arabidopsis thaliana* cell wall mutants

| Gene locus | Gene name    | Mutant ID                      | LP primer               | RP primer             |
|------------|--------------|--------------------------------|-------------------------|-----------------------|
| At2g45470  | <i>AGP8</i>  | SALK_141852                    | ATGTAGAACATGAACGTCGGC   | CTTTGCCTCCTTTAAGATCGG |
| At1g45130  | <i>BGAL5</i> | SALK_139681                    | TGCTCCTATCGATGAATACGG   | CTTAGAACTAACCGGCAACCC |
| At3g29090  | <i>PME31</i> | SALK_074820                    | TCAAATTTACCTAGGTGATTTG  | CACAACCAAACGTACCAGTCC |
| At1g13860  | <i>QUL1</i>  | SALK_094635                    | CATTTGACATGGTCCACTGTG   | TCATCACCCAAACTGATTTCC |
| At3g21190  | <i>MSR1</i>  | SALK_075245                    | CAAGACCTTCCATTTTTGGATC  | TACAGGATCAGTTTCGCCATC |
| At2g35100  | <i>ARAD1</i> | (Harholt <i>et al.</i> , 2006) | TATGTGTTCCAGGGTGGAAAAGT | GGGAGACTTGACGCCAGATT  |
| At5g44930  | <i>ARAD2</i> | (Harholt <i>et al.</i> , 2012) | GTAGTTGTGTATACCCTAGACT  | CGCCTCAGCCGGGTCAAAA   |

Harholt, J. *et al.* ARABINAN DEFICIENT 1 is a putative arabinosyltransferase involved in biosynthesis of pectic arabinan in *Arabidopsis*. *Plant Physiol.* **140**, 49-58 (2006).

Harholt, J. *et al.* ARAD proteins associated with pectic arabinan biosynthesis form complexes when transiently overexpressed in planta. *Planta* **236**, 115-128 (2012).
